# Supplementary material for: A graphene oxide-wrapped bipyramidal sulfur@polyaniline core–shell structure as a cathode for Li–S batteries with enhanced electrochemical performance
Source: Royal Society of Chemistry journal article supplement (doi:10.1039/c6ta01118g), 2016-01-01
Supplement: c6ta01118g1.pdf [file c6ta01118g1.pdf]

## Supplementary Information

### **Graphene oxide-wrapped bipyramidal sulfur@ polyaniline core-shell structure as cathode for Li-S battery with enhanced electrochemical performance**

**Kailong Zhang,<sup>a</sup> Yanhua Xu,<sup>a</sup> Yue Lu,<sup>a</sup> Yongchun Zhu,<sup>\*a</sup> Yuying Qian,<sup>a</sup> Danfeng Wang,<sup>a</sup> Jianbin Zhou,<sup>a</sup> Ning Lin,<sup>a</sup> and Yitai Qian<sup>\*a,b</sup>**

<sup>a</sup> Department of Chemistry and Hefei National Laboratory for Physical Science at Microscale, University of Science and Technology of China, Hefei, 230026, P.R. China. Tel: +86-551-63601589; E-mail: ychzhu@ustc.edu.cn

\*Corresponding author. Tel.: 86-551-6360-1589; Fax: +86-551-360-7402.  
E-mail address: ychuzhu@ustc.edu.cn (Y. C. Zhu), ytqian@ustc.edu.cn. (Y. Qian)

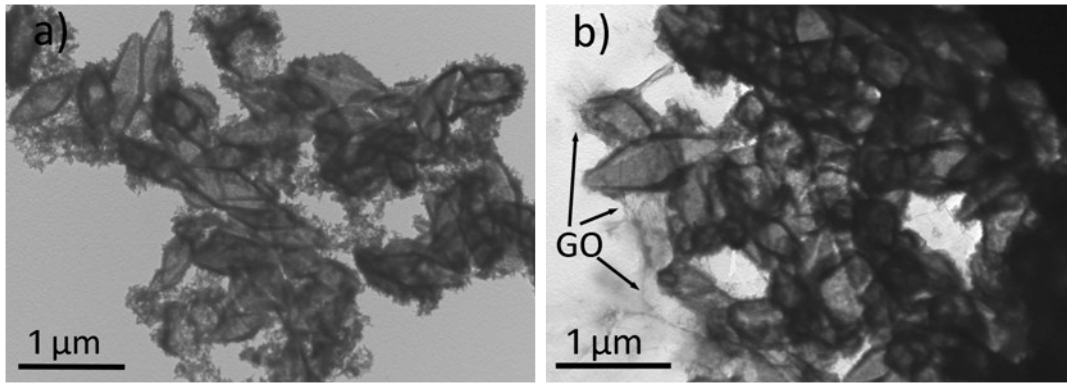

Figure S1 TEM of (a)S@PANI and (b) S@PANI/GO after dealing with acetone.

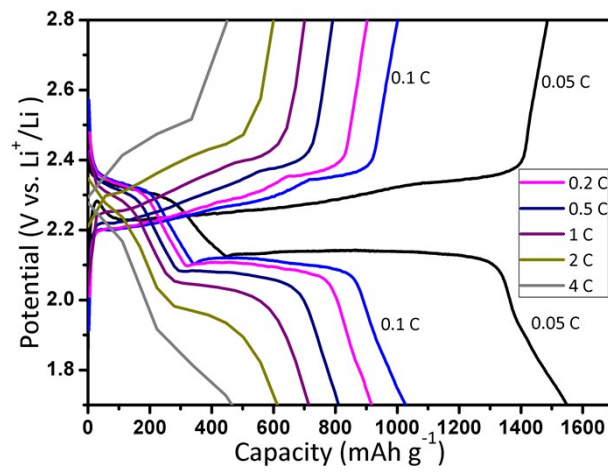

Figure S2 Voltage-capacity curves of S@PANI/GO electrode at different rates (increased from 0.05 C to 4 C).

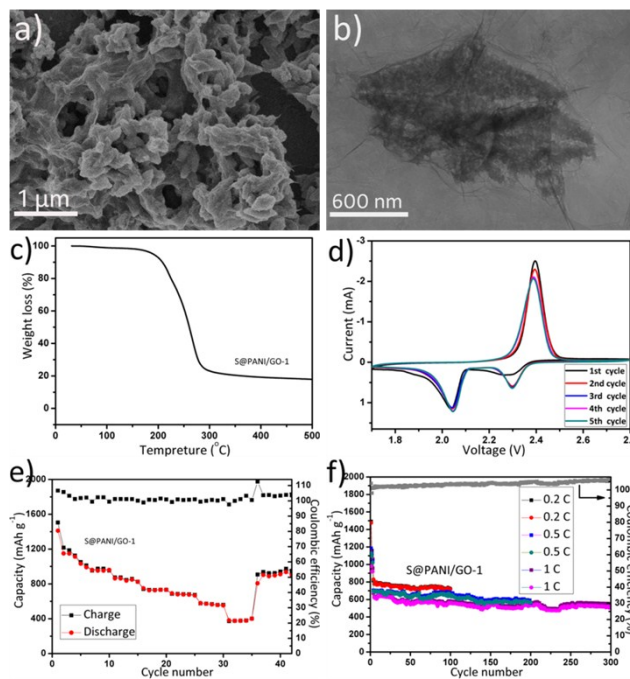

Figure S3 (a) SEM image of S@PANI/GO-1 composite; (b) TEM (after dealing with acetone) image of S@PANI/GO-1 composite; (c) TGA curve of S@PANI/GO-1 composite, including 78.1 wt% content of sulfur and 1.5 wt% absorbed water; (d) Cyclic voltammograms of S@PANI/GO-1 and the scan rate of all tests is 0.1 mV s<sup>-1</sup>; (e) Cycle performance of S@PANI/GO-1 composite (the gray line is the coulombic efficiency of 1 C).

Table S1 Summary of representative graphene-based PANI/ S composite

| Cathode content         | sulfur loading (wt %) | Sulfur loading (wt %) | Mass loading (mg cm <sup>-2</sup> ) | Discharge current rate | Reversible discharge capacity/(mA h g <sup>-1</sup> ) |             | Voltage range (V vs.Li/Li <sup>+</sup> ) | Reference number |
|-------------------------|-----------------------|-----------------------|-------------------------------------|------------------------|-------------------------------------------------------|-------------|------------------------------------------|------------------|
|                         |                       |                       |                                     |                        | Initial                                               | After (nth) |                                          |                  |
| S@PANI/GO               | 54.3                  | 54.3                  | 1.8-3.0                             | 1 C                    | 1027                                                  | 641 (300)   | 1.7-2.8                                  | this work        |
| S@PANI/GO               | 78.9                  | 78.9                  | 1.8-3.0                             | 0.2 C                  | 1485                                                  | 730 (100)   | 1.7-2.8                                  | this work        |
| S@PANI/GO               | 78.1                  | 78.1                  | 1.8-3.0                             | 1 C                    | 1100                                                  | 540 (300)   | 1.7-2.8                                  | this work        |
| nanoS@PANI/G            | 53                    | 53                    | 0.8                                 | 0.1 C                  | 1625                                                  | 600 (100)   | 1.5-3.0                                  | 1                |
| PANI-modified CTAB-GO-S | 70.1                  | 70.1                  | 0.8                                 | 0.2 C                  | 1016                                                  | 715 (300)   | 1.6-2.8                                  | 2                |
| PANI/GO@S               | 66.4                  | 66.4                  | 1.5                                 | 0.2 C                  | 1037                                                  | 599 (200)   | 1.8-2.7                                  | 3                |
| Sulfur-PANI-GNRs        | 62                    | 62                    | 1.2                                 | 0.4 C                  | 673                                                   | 514 (400)   | 1.7-3.0                                  | 4                |
| NGNS-S-PANI             | 52.5                  | 52.5                  | N/A                                 | 0.5 C                  | 1277                                                  | 694 (100)   | 1.4-3.0                                  | 5                |
| graphene/S/PANI         | 75                    | 75                    | N/A                                 | 0.1 C                  | N/A                                                   | 740 (150)   | 1.5-3.0                                  | 6                |
| CG-S@PANI               | 55                    | 55                    | 0.6-1.2                             | 0.2 C                  | 851                                                   | 633 (100)   | 1.5-2.8                                  | 7                |

1. Y. Liu, J. Zhang, X. Liu, J. Guo, L. Pan, H. Wang, Q. Su, G. Du. *Mater. Lett.*, 2014, **133**, 193.
2. Y. Qiu, W. Li, G. Li, Y. Hou, L. Zhou, H. Li, M. Liu, F. Ye, X. Yang, Y. Zhang. *Nano Res.*, 2014, **7**, 1355.
3. X. Wang, Z. Zhang, X. Yan, Y. Qu, Y. Lai, J. Li. *Electrochim. Acta*, 2015, **155**, 54.
4. L. Li, G. Ruan, Z. Peng, Y. Yang, H. Fei, A.O. Raji, E.L.G. Samuel, J.M. Tour. *ACS Appl. Mater. Interfaces*, 2014, **6**, 15033.
5. K. Ding, Y.K. Bu, Q. Liu, T.F. Li, K. Meng, Y.B. Wang. *J. Mater. Chem. A*, 2015, **3**, 8022.
6. P. Wei, M.Q. Fan, H.C. Chen, X.R. Yang, H.M. Wu, J.D. Chen, T. Li, L.W. Zeng, Y.J. Zou. *Electrochim. Acta*, 2015, **174**, 963.
7. X. Li, M. Rao, H. Lin, D. Chen, Y. Liu, S. Liu, Y. Liao, L. Xing, M. Xu, W. Li. *J. Mater. Chem. A*, 2015, **3**, 18098.

Table S2 Equivalent-Circuit Parameters Obtained from Fitting the Experimental Impedance Spectra

| Samples       | $R_1(\Omega)$ | $R_2(\Omega)$ | $R_3(\Omega)$ | $CPE_1(F)$            | $CPE_2(F)$            | W-P     |
|---------------|---------------|---------------|---------------|-----------------------|-----------------------|---------|
| S             | 3.469         | 47.39         | 36.81         | $8.01 \times 10^{-6}$ | $8.89 \times 10^{-4}$ | 0.43268 |
| S/GO          | 2.329         | 27.54         | 18.72         | $1.02 \times 10^{-5}$ | $2.50 \times 10^{-3}$ | 0.36798 |
| S@PANI        | 1.872         | 11.33         | 17.16         | $8.29 \times 10^{-6}$ | $1.32 \times 10^{-3}$ | 0.36175 |
| S@PANI/G<br>O | 2.321         | 7.604         | 12.42         | $1.08 \times 10^{-5}$ | $2.33 \times 10^{-3}$ | 0.41274 |

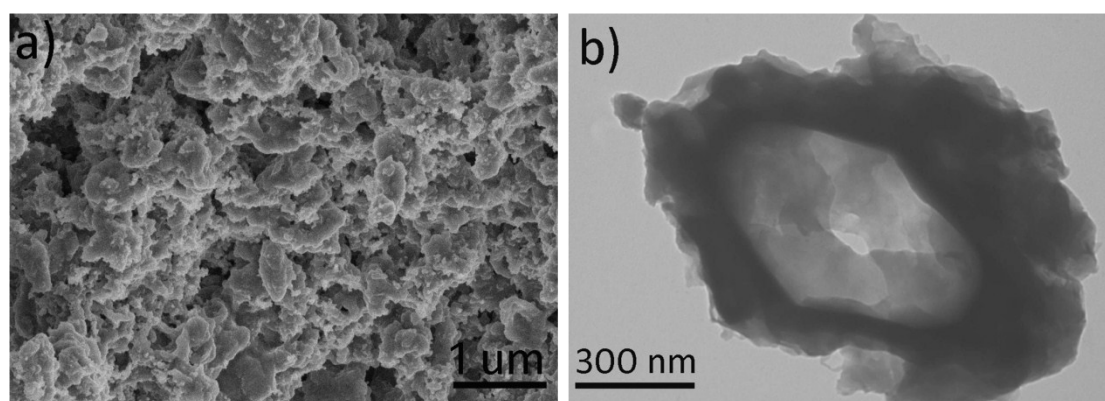

Figure S4 (a) SEM image, and (b) TEM (after dealing with acetone) image of S@PANI/GO composite after 100 cycles.
